# Supplementary material for: Testing of therapies in a novel nebulin nemaline myopathy model demonstrate a lack of efficacy
Source: PubMed Central journal article supplement (PMC5977763; doi:10.1186/s40478-018-0546-9), 2018-05-30
Supplement: 40478_2018_546_MOESM1_ESM.pdf [file 40478_2018_546_MOESM1_ESM.pdf]

Supplementary Information

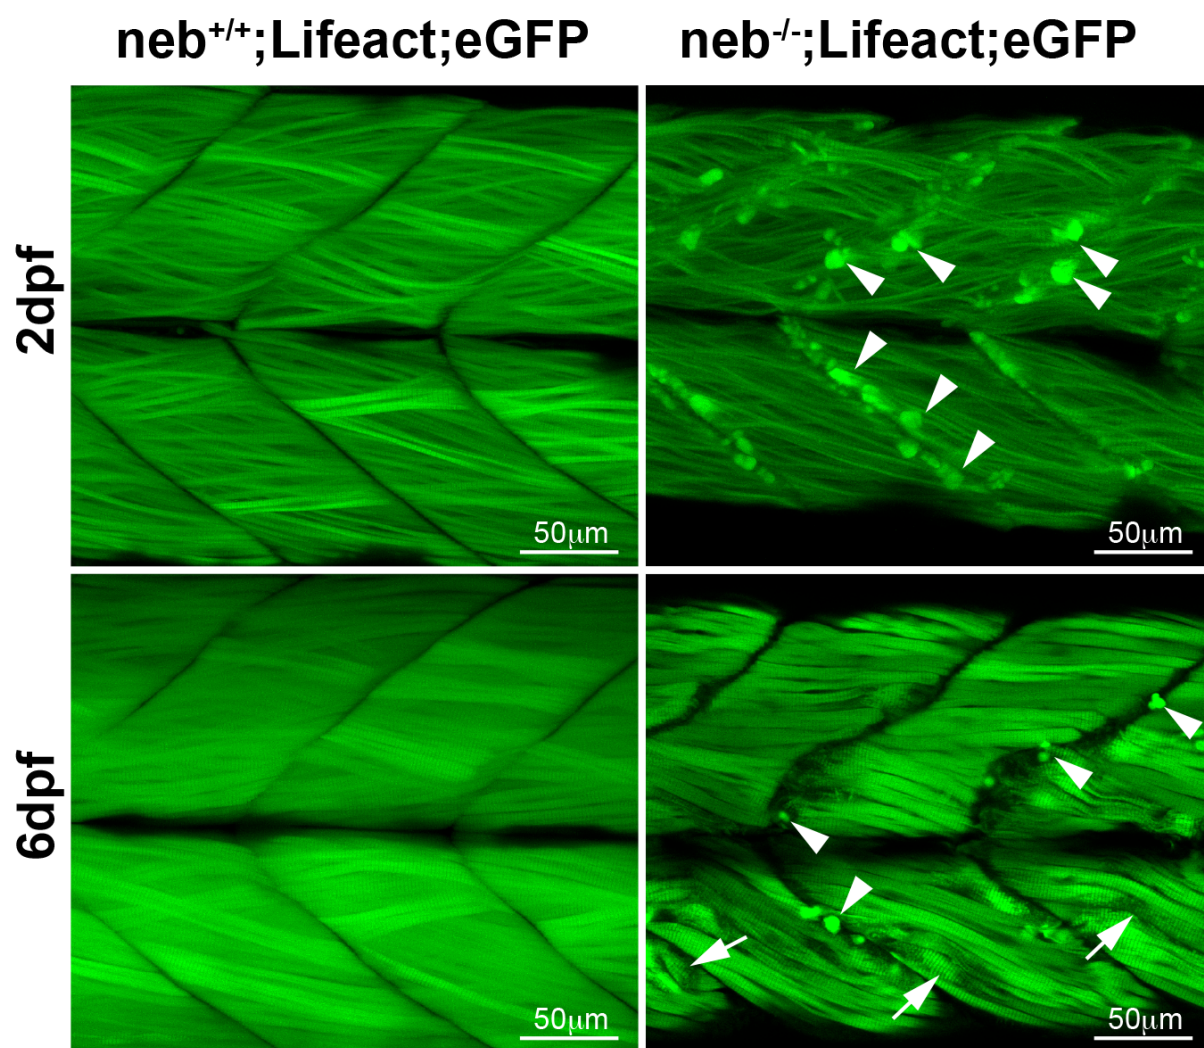

**Fig S1: Characterisation of  $Tg(neb^{-/-}; Lifeact-eGFP)$  fish.**  $Tg(neb^{-/-}; Lifeact-eGFP)$  fish show an accumulation of Lifeact-eGFP at the myosepta (arrowheads) at both 2 dpf and 6 dpf as well as regions of disorganized muscle fibers (arrows) at 6 dpf that are not observed in  $Tg(neb^{+/+}; Lifeact-eGFP)$  siblings.

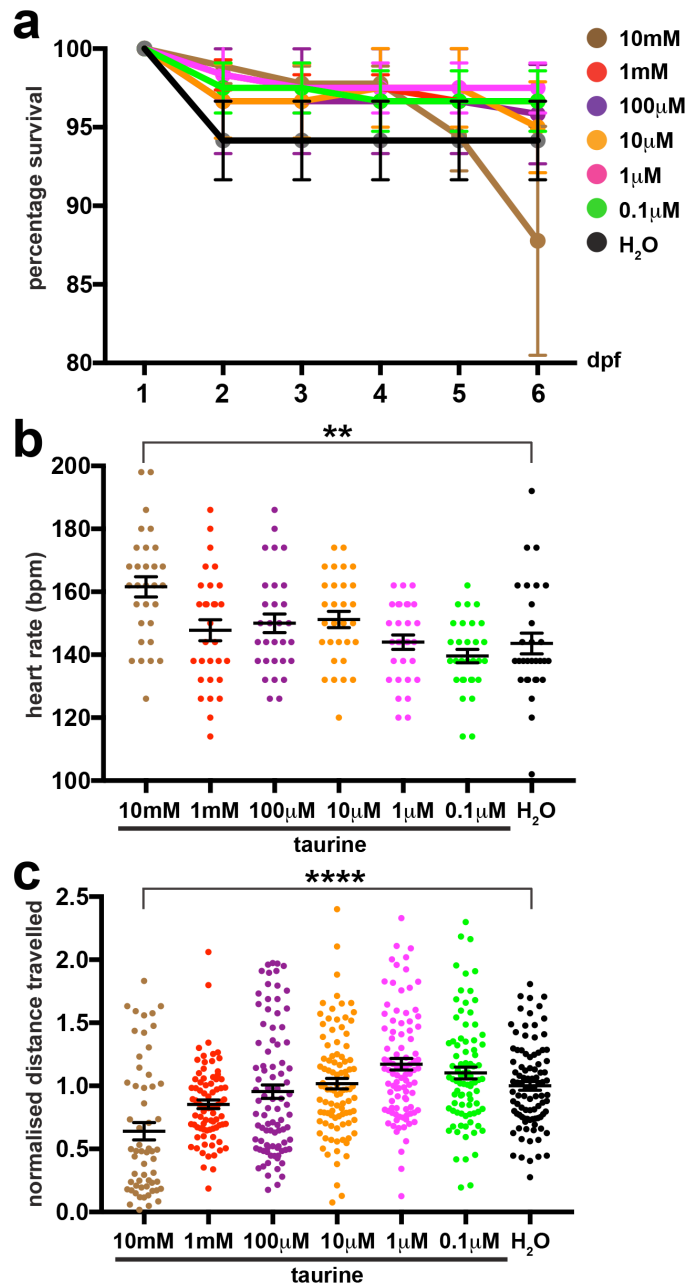

**Fig S2: Toxicity analyses for treatment of wildtype zebrafish with taurine.** a) Percentage survival and b) resting heart rate in beats per minute (bpm) of zebrafish treated with increasing taurine concentrations (from 0.1  $\mu\text{M}$  to 10 mM) or water ( $\text{H}_2\text{O}$ ). Error bars represent mean $\pm$ SEM for three independent experiments with 30 zebrafish per experiment for survival assays and 10 zebrafish per experiment for heart rate assays, \*\* $p < 0.01$ . c) Normalised distance travelled by 6 dpf zebrafish treated with increasing taurine concentrations (from 0.1  $\mu\text{M}$  to 1 mM) or  $\text{H}_2\text{O}$ . Error bars represent mean $\pm$ SEM for three independent experiments with  $n=15,22,21$  for 10mM,  $n=23,24,24$  for 1mM,  $n=19,24,24$  for 100  $\mu\text{M}$ ,  $n=24,24,24$  for 10  $\mu\text{M}$ ,  $n=24,23,24$  for 1  $\mu\text{M}$ ,  $n=24,24,24$  for 0.1  $\mu\text{M}$  and  $n=24,23,23$  for  $\text{H}_2\text{O}$  per experiment, \*\*\*\* $p < 0.0001$ .

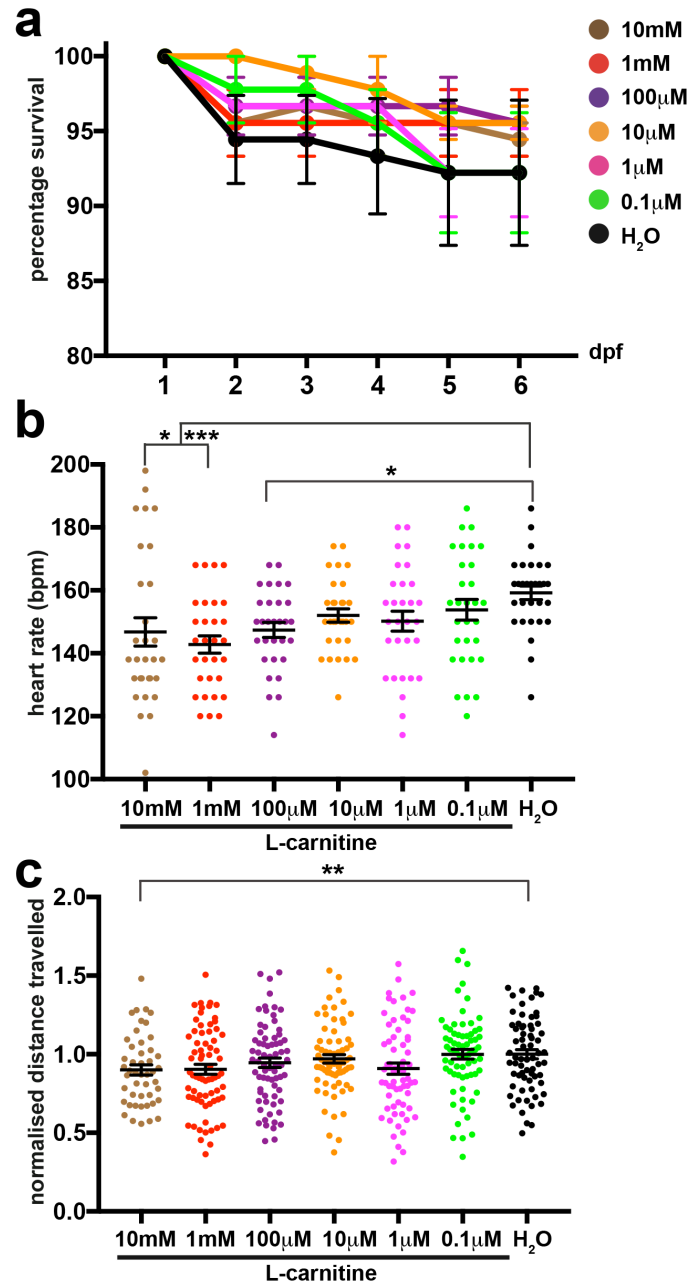

**Fig S3: Toxicity analyses for treatment of wildtype zebrafish with L-carnitine.** a) Percentage survival and b) resting heart rate in beats per minute (bpm) of zebrafish treated with increasing L-carnitine concentrations (from 0.1  $\mu$ M to 10 mM) or water (H<sub>2</sub>O). Error bars represent mean $\pm$ SEM for three independent experiments with 30 zebrafish per experiment for survival assays and 10 zebrafish per experiment for heart rate assays, \* $p$ <0.05 and \*\*\* $p$ <0.001. c) Normalised distance travelled by 6 dpf zebrafish treated with increasing L-carnitine concentrations (from 0.1  $\mu$ M to 1 mM) or water (H<sub>2</sub>O). Error bars represent mean $\pm$ SEM for three independent experiments with  $n=18,23,6$  for 10mM,  $n=24,23,23$  for 1mM,  $n=24,24,23$  for 100  $\mu$ M,  $n=24,24,23$  for 10  $\mu$ M,  $n=23,16,23$  for 1  $\mu$ M,  $n=24,23,23$  for 0.1  $\mu$ M and  $n=22,24,22$  for H<sub>2</sub>O per experiment, \*\* $p$ <0.01.

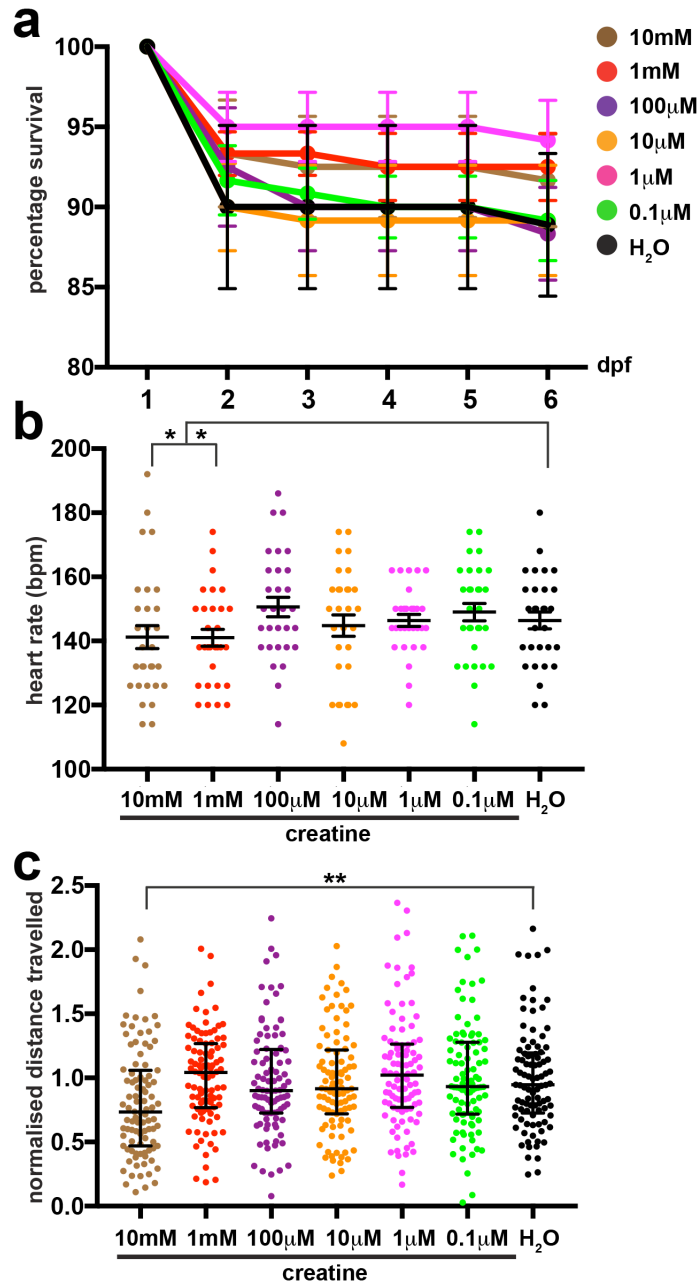

**Fig S4: Toxicity analyses for treatment of wildtype zebrafish with creatine.** a) Percentage survival and b) resting heart rate in beats per minute (bpm) of zebrafish treated with increasing creatine concentrations (from 0.1  $\mu$ M to 10 mM) or water (H<sub>2</sub>O). Error bars represent mean $\pm$ SEM for three independent experiments with 30 zebrafish per experiment for survival assays and 10 zebrafish per experiment for heart rate assays, \* $p$ <0.05. c) Normalised distance travelled by 6 dpf zebrafish treated with increasing creatine concentrations (from 0.1  $\mu$ M to 1 mM) or water (H<sub>2</sub>O). Error bars represent median $\pm$ interquartile range for four independent experiments with  $n=24,23,23,24$  for 10mM,  $n=24,22,24,24$  for 1mM,  $n=24,24,22,23$  for 100  $\mu$ M,  $n=24,24,24,23$  for 10  $\mu$ M,  $n=24,24,24,23$  for 1  $\mu$ M,  $n=24,24,24,24$  for 0.1  $\mu$ M and  $n=24,23,23,23$  for H<sub>2</sub>O per experiment, \*\* $p$ <0.01.

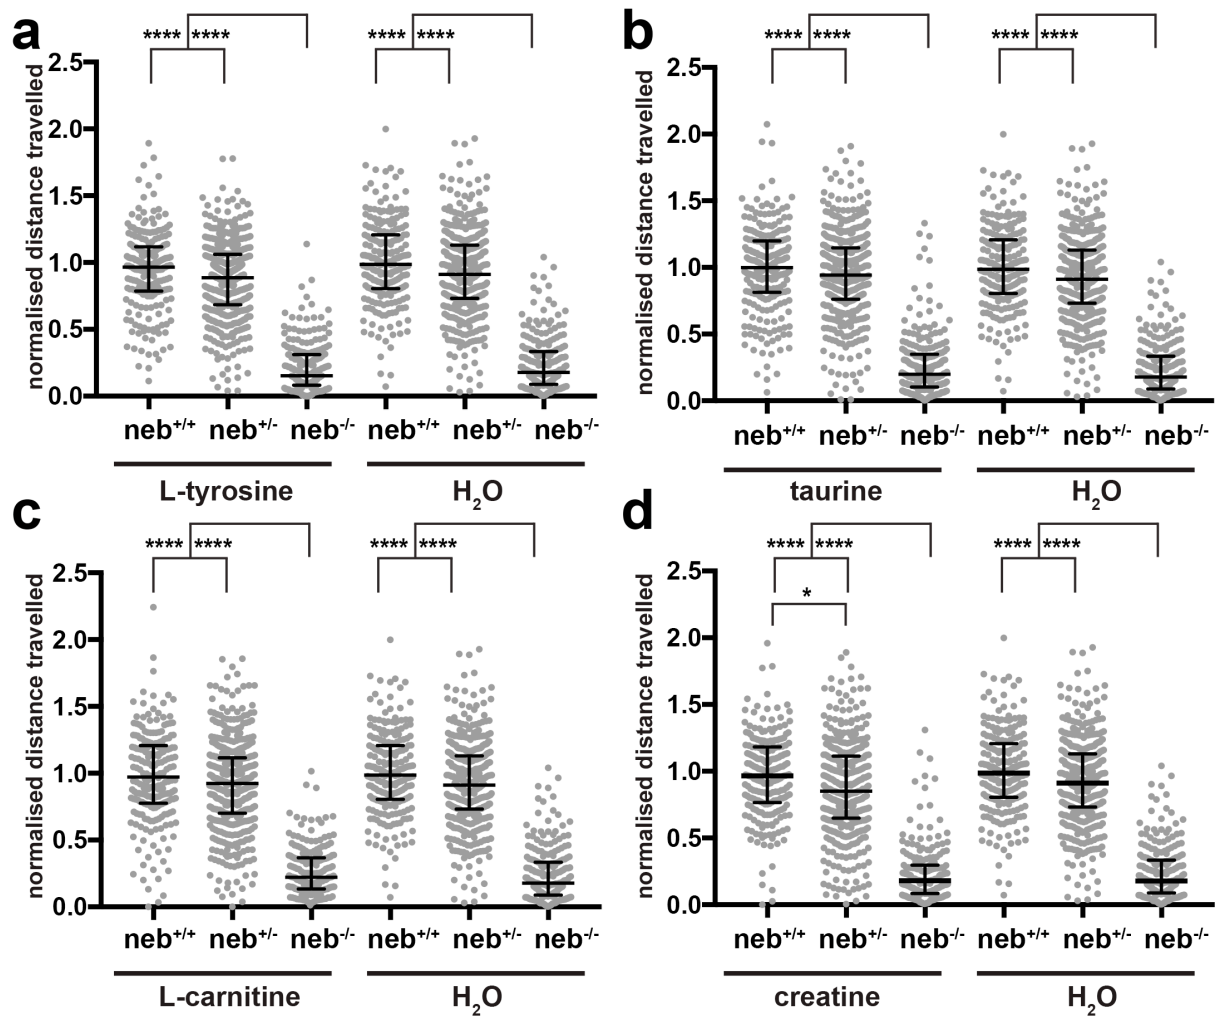

**Fig S5: Quantification of distance travelled by *neb*<sup>-/-</sup> mutants and wildtype siblings at 6 dpf.** Quantification of the normalized distance travelled by *neb*<sup>-/-</sup> mutants compared to wildtype siblings at 6 dpf supplemented with either a) L-tyrosine, b) taurine, c) L-carnitine, d) creatine, or water (H<sub>2</sub>O). Error bars represent median±interquartile range for three independent experiments (n = 81,79,51 *neb*<sup>-/-</sup>, 187,185,107 *neb*<sup>+/-</sup>, 85,82,52 *neb*<sup>+/+</sup> for L-tyrosine; n = 82,89,59 *neb*<sup>-/-</sup>, 183,158,94 *neb*<sup>+/-</sup>, 95,101,42 *neb*<sup>+/+</sup> for taurine; n = 90,86,40 *neb*<sup>-/-</sup>, 179,172,107 *neb*<sup>+/-</sup>, 87,79,46 *neb*<sup>+/+</sup> for L-carnitine; n = 82,82,42 *neb*<sup>-/-</sup>, 189,174,97 *neb*<sup>+/-</sup>, 86,86,52 *neb*<sup>+/+</sup> for creatine, and n = 87,96,42 *neb*<sup>-/-</sup>, 171,165,102 *neb*<sup>+/-</sup>, 89,94,51 *neb*<sup>+/+</sup> for water per experiment), \*\*\*\*p<0.0001.

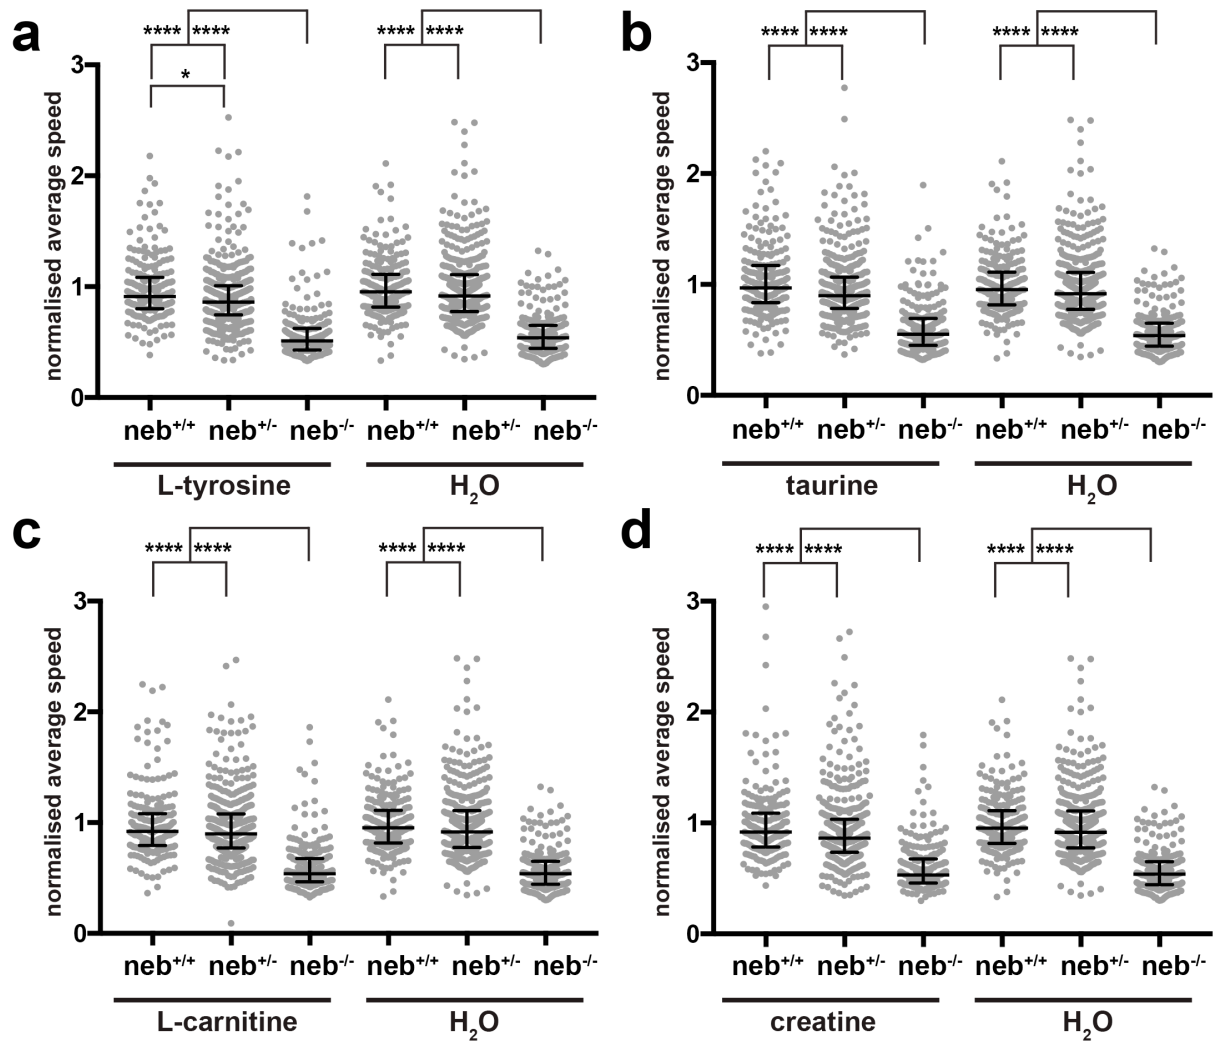

**Fig S6: Quantification of speed travelled by  $neb^{-/-}$  mutants and wildtype siblings at 6 dpf.** Quantification of the normalized speed travelled by  $neb^{-/-}$  mutants compared to wildtype siblings at 6 dpf supplemented with either a) L-tyrosine, b) taurine, c) L-carnitine, d) creatine, or water (H<sub>2</sub>O). *Error bars* represent median  $\pm$  interquartile range for three independent experiments (n = 81,79,51  $neb^{-/-}$ , 187,185,107  $neb^{+/-}$ , 85,82,52  $neb^{+/+}$  for L-tyrosine; n = 82,89,59  $neb^{-/-}$ , 183,158,94  $neb^{+/-}$ , 95,101,42  $neb^{+/+}$  for taurine; n = 92,79,46  $neb^{-/-}$ , 179,172,107  $neb^{+/-}$ , 90,86,40  $neb^{+/+}$  for L-carnitine; n = 82,82,42  $neb^{-/-}$ , 189,174,97  $neb^{+/-}$ , 86,86,52  $neb^{+/+}$  for creatine and n = 87,96,42  $neb^{-/-}$ , 171,165,102  $neb^{+/-}$ , 89,94,51  $neb^{+/+}$  for water per experiment), \* $p < 0.05$  and \*\*\*\* $p < 0.0001$ .

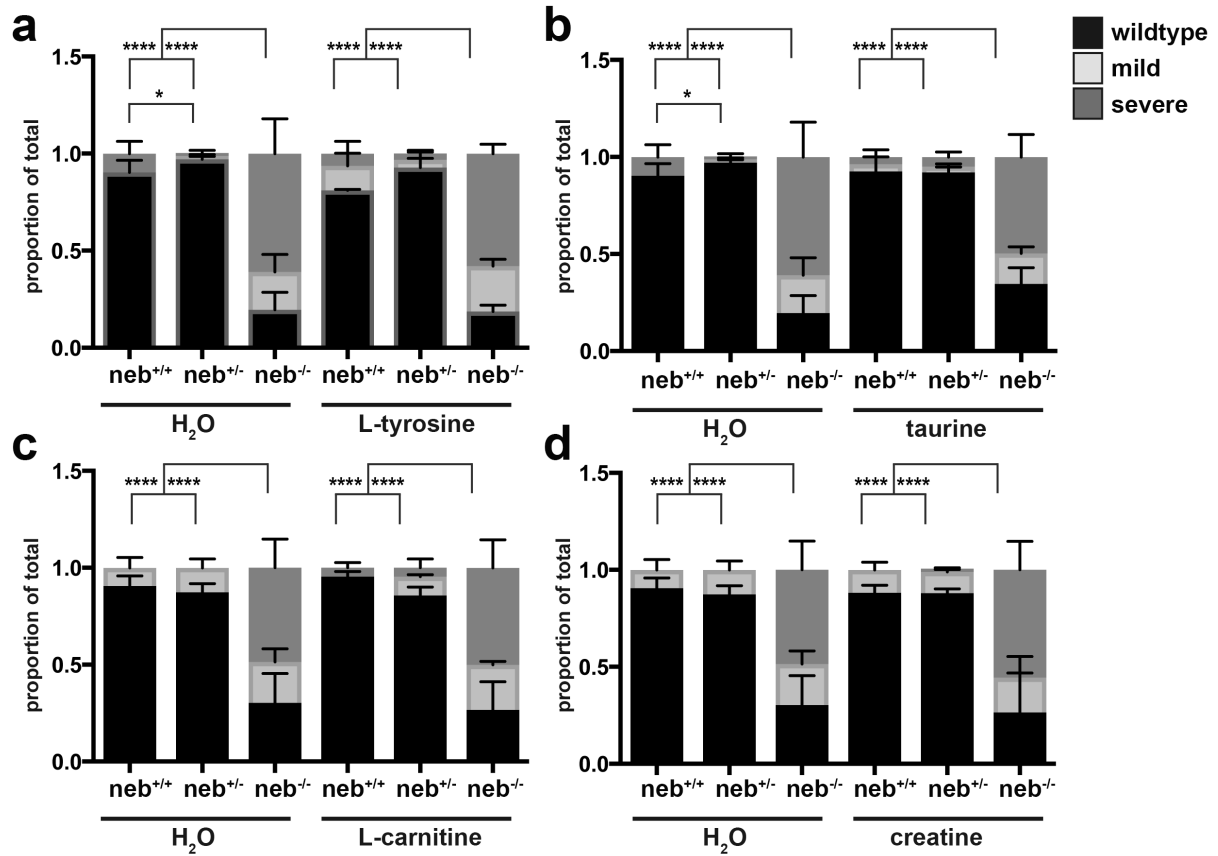

**Fig S7: Quantification of the phenotypic severity of *neb*<sup>-/-</sup> mutants and wildtype siblings at 6 dpf.** Quantification of the phenotypic severity of Tg(*neb*<sup>-/-</sup>; *Lifeact-eGFP*) fish and their wildtype siblings supplemented with either a) L-tyrosine, b) taurine, c) L-carnitine, d) creatine or water (H<sub>2</sub>O). Error bars represent mean ± SEM for three independent experiments (For a & b) n = 6,8,7 Tg(*neb*<sup>-/-</sup>; *Lifeact-eGFP*), 18,18,25 Tg(*neb*<sup>+/-</sup>; *Lifeact-eGFP*), 16,10,11 Tg(*neb*<sup>+/+</sup>; *Lifeact-eGFP*) for L-tyrosine, n = 11,5,11 Tg(*neb*<sup>-/-</sup>; *Lifeact-eGFP*), 16,23,23 Tg(*neb*<sup>+/-</sup>; *Lifeact-eGFP*), 7,9,11 Tg(*neb*<sup>+/+</sup>; *Lifeact-eGFP*) for taurine; and n = 9,8,10 Tg(*neb*<sup>-/-</sup>; *Lifeact-eGFP*), 27,20,14 Tg(*neb*<sup>+/-</sup>; *Lifeact-eGFP*), 14,11,13 Tg(*neb*<sup>+/+</sup>; *Lifeact-eGFP*) for water. For C & D) n = 8,10,4 Tg(*neb*<sup>-/-</sup>; *Lifeact-eGFP*), 24,22,17 Tg(*neb*<sup>+/-</sup>; *Lifeact-eGFP*), 11,6,21 Tg(*neb*<sup>+/+</sup>; *Lifeact-eGFP*) for L-carnitine, n = 6,8,3 Tg(*neb*<sup>-/-</sup>; *Lifeact-eGFP*), 30,22,19 Tg(*neb*<sup>+/-</sup>; *Lifeact-eGFP*), 8,11,21 Tg(*neb*<sup>+/+</sup>; *Lifeact-eGFP*) for creatine; and n = 10,9,5 Tg(*neb*<sup>-/-</sup>; *Lifeact-eGFP*), 16,20,29 Tg(*neb*<sup>+/-</sup>; *Lifeact-eGFP*), 15,10,11 Tg(*neb*<sup>+/+</sup>; *Lifeact-eGFP*) for water per experiment), \*p < 0.05 and \*\*\*\*p < 0.0001.



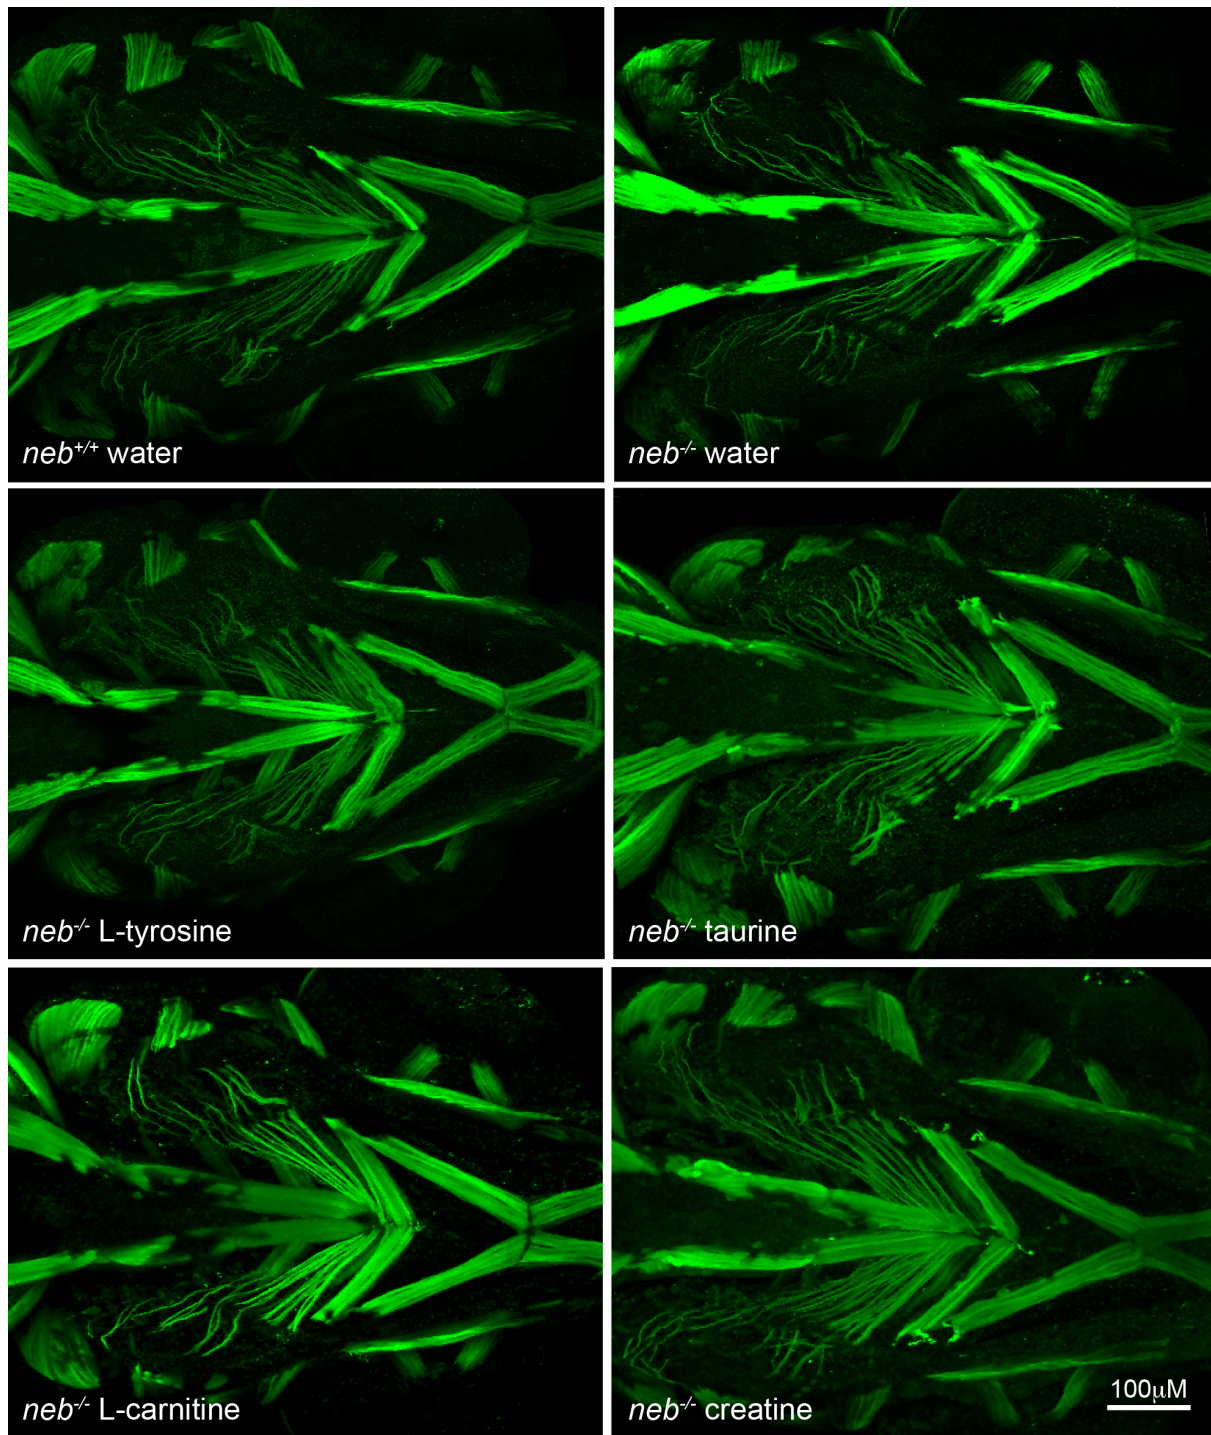

**Fig S8: Characterisation of facial muscles in *Tg(neb<sup>-/-</sup>; Lifeact-eGFP)* fish and wild type siblings at 6 dpf.** Maximum projection images of *Tg(neb<sup>-/-</sup>; Lifeact-eGFP)* fish supplemented with water, tyrosine, taurine, L-carnitine or creatine show no difference in the appearance of facial muscles to *Tg(neb<sup>+/+</sup>; Lifeact-eGFP)* siblings supplemented with water.
